# Supplementary material for: DNA/RNA chimera templates improve the emission intensity and target the accessibility of silver nanocluster-based sensors for human microRNA detection
Source: Royal Society of Chemistry journal article supplement (doi:10.1039/c5an00093a), 2015-01-01
Supplement: c5an00093a1.pdf [file c5an00093a1.pdf]

## Supplementary Figures

### **DNA/RNA chimera templates improve the emission intensity and target accessibility of AgNCs-based sensors for human miRNA detection**

*Pratik Shah<sup>†§</sup>, Suk Won Choi<sup>‡§</sup>, Ho-jin Kim<sup>‡§</sup>, Seok Keun Cho<sup>†</sup>, Peter Waaben Thulstrup<sup>€</sup>, Morten Jannik Bjerrum<sup>€</sup>, Yong-Joo Bhang<sup>‡</sup>, Jong Cheol Ahn<sup>‡</sup>, and Seong Wook Yang<sup>†\*</sup>*

<sup>†</sup>UNIK Center for Synthetic Biology, University of Copenhagen, Thorvaldsensvej 40, DK-1871 Frederiksberg C, Copenhagen, Denmark

<sup>€</sup>Department of Chemistry, University of Copenhagen, Universitetsparken 5, DK-2100, Copenhagen, Denmark

<sup>‡</sup>Seoulin Bioscience Co. Ltd. 4F. #A, KOREA BIO PARK, 700, Daewangpangyo-ro, Bundang-gu, Seongnam-si, Gyeonggi-do, Korea

<sup>§</sup>Equal contributions

\*Correspondence E-mail: [swyang@life.ku.dk](mailto:swyang@life.ku.dk) (S.W.Y.)

**DNA-12nt-RED-let-7a**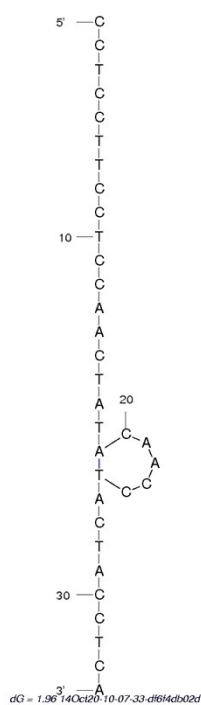**Let-7a-DNA-12nt-RED**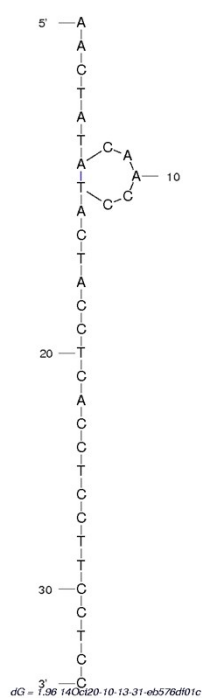**DNA-12nt-RED-let-7a-GG**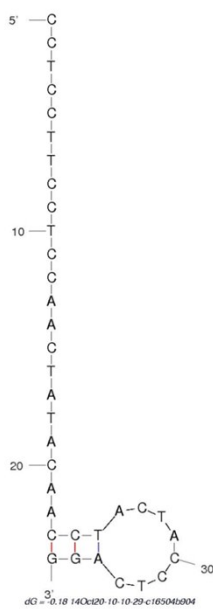**GG-Let-7a-DNA-12nt-RED**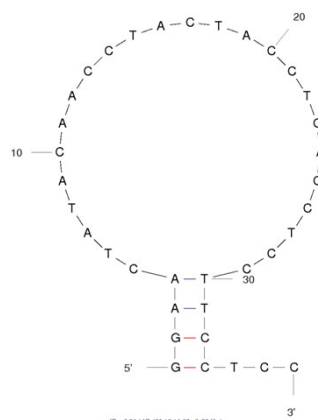

Supplementary Figure S1. Prediction of secondary structures of DNA/AgNCs probes for let-7a. To predict the structures, we used m-fold DNA program (<http://mfold.rna.albany.edu/?q=mfold>).

|            |                         |
|------------|-------------------------|
| miR-21-5p  | UAGCUUAUCAGACUGAUGUUGA  |
| miR-200c   | UAAUACUGCCGGUAAUGAUGGA  |
| miR-122    | UGGAGUGUGACAUAUGGUGUUUG |
| ath-miR166 | UCGGACCAGGCUUCAUUCCCC   |
| ath-miR172 | AGAAUCUUGAUGAUGCUGCAU   |
| Let-7a     | UGAGGUAGUAGGUUGUAUAGUU  |

Supplementary Figure S2. Target miRNA sequences used in this study.

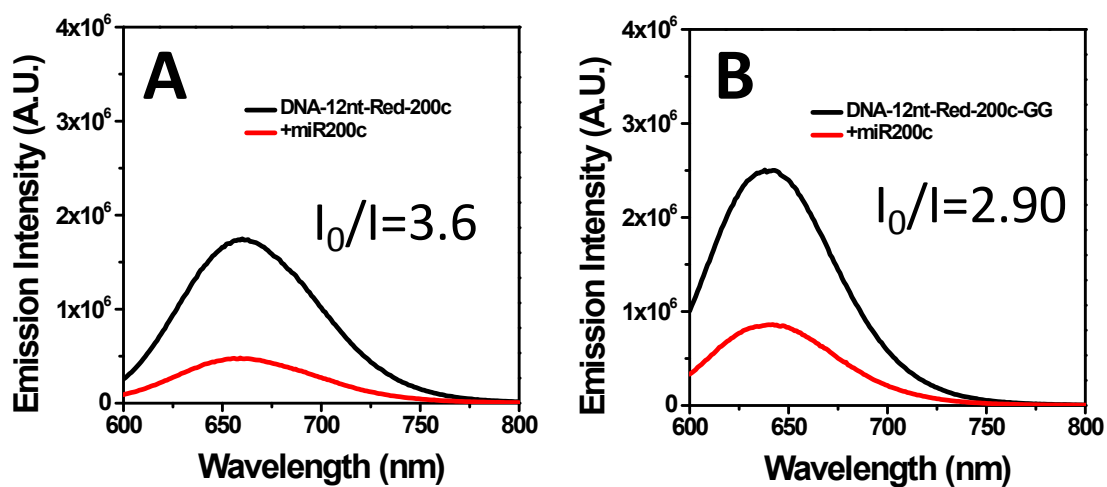

Supplementary Figure S3. Target sensitivity of two DNA probes against miR-200c. A) The emission intensity of DNA-12nt-RED-200c probe was diminished 3.6 fold by miR-200c. B) The emission intensity of D-12nt-R-23nt-200c probe was diminished 2.9 fold by miR-200c. These results suggest that the secondary structure of DNA-12nt-RED-200c is more stable than target accessibility.

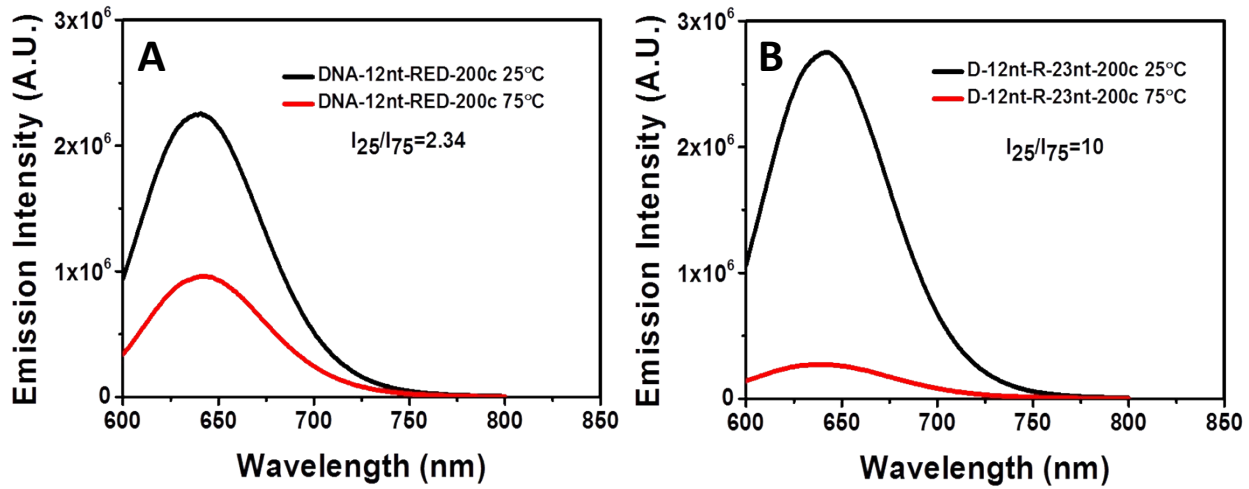

Supplementary Figure S4. Comparison of emission intensity between 25 °C and 75 °C. A) The emission intensity of DNA-12nt-RED-200c probe was diminished 2.3 fold under 75°C. B) The emission intensity of D-12nt-R-23nt-200c probe was diminished 10 fold under 75°C. These results suggest that the secondary structure of DNA-12nt-RED-200c is more stable than that of D-12nt-R-23nt-200c.

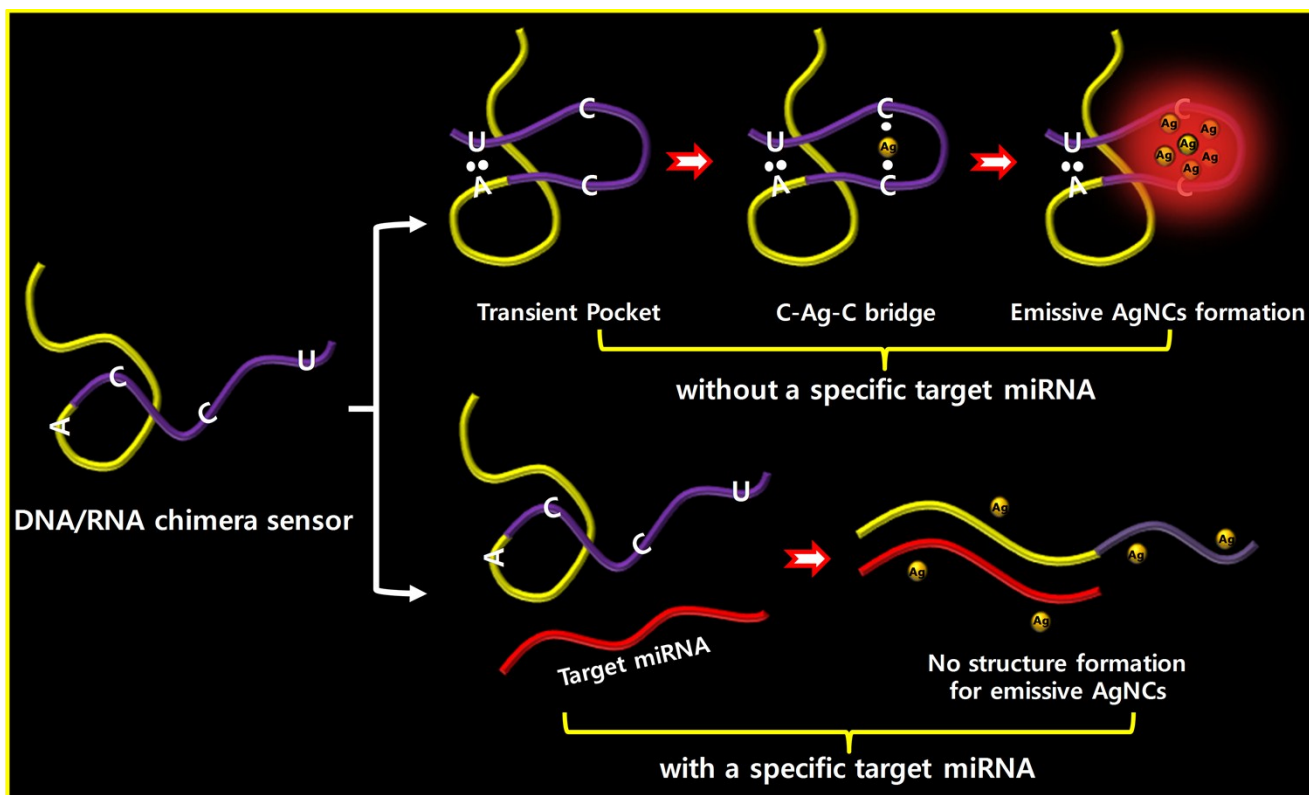

Supplementary Figure S5. A summarized scheme of DNA/RNA chimera sensor strategy
